# Supplementary material
Source: PubMed Central journal article supplement (PMC4605360)
Supplement: Supp_Fig1.pdf [file Supp_Fig1.pdf]

## Supplementary Data

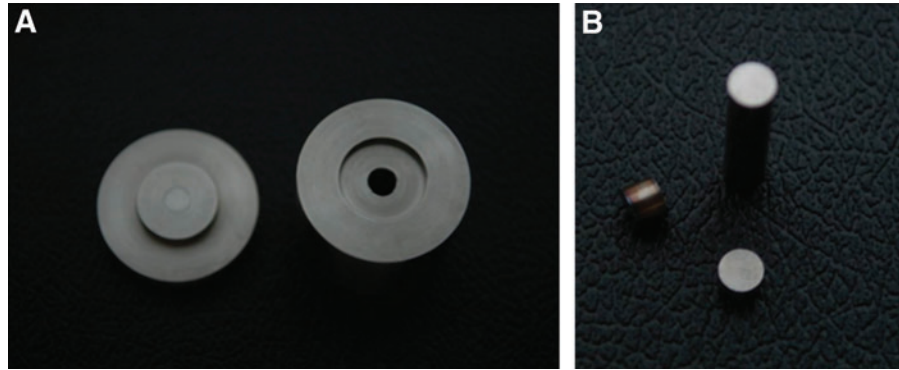

**SUPPLEMENTARY FIG. S1.** Custom-designed dye for developing hydroxyapatite discs. (A) The *top* and *bottom* portions of the dye and (B) the accessory components used for making the ceramic disc using the dye.
