# Supplementary material
Source: PubMed Central journal article supplement (PMC4605360)
Supplement: Supp_Fig2.pdf [file Supp_Fig2.pdf]

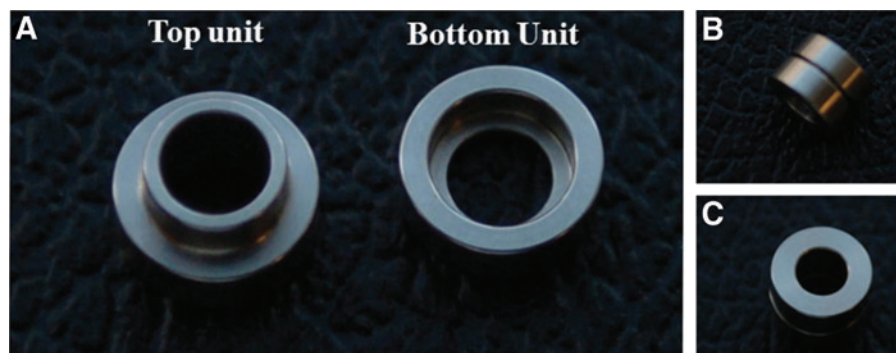

**SUPPLEMENTARY FIG. S2.** Custom-designed electrospun scaffold holder. (A) The individual parts of the holder. (B, C) The images showing the assembled scaffold holder.
