# Supplementary material
Source: PubMed Central journal article supplement (PMC4605360)
Supplement: Supp_Fig3.pdf [file Supp_Fig3.pdf]

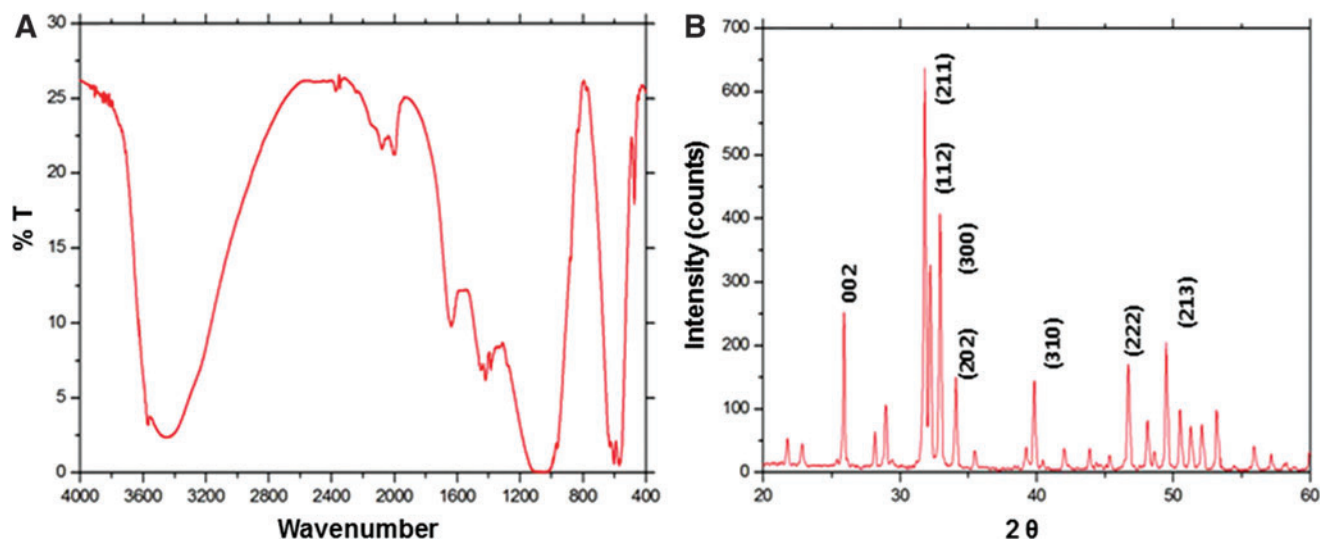

**SUPPLEMENTARY FIG. S3.** Characterization of ceramic discs. The X-ray diffractometry and Fourier transform infrared spectroscopy pattern of the developed ceramic discs are shown as **A** and **B**, respectively.
