# Supplementary material
Source: PubMed Central journal article supplement (PMC4605360)
Supplement: Supp_Fig4.pdf [file Supp_Fig4.pdf]

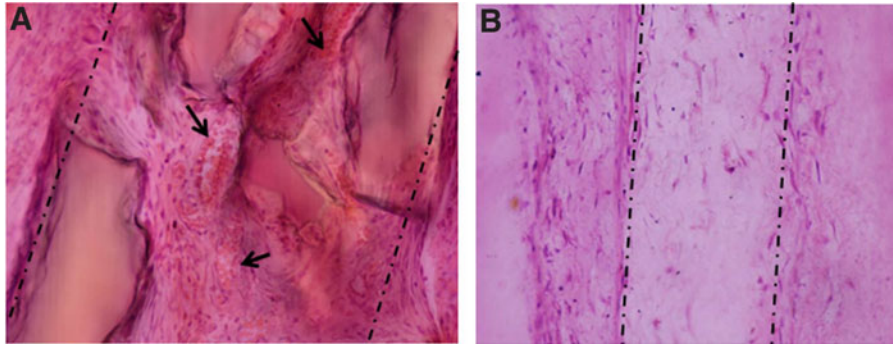

**SUPPLEMENTARY FIG. S4.** Vessel infiltration in to the osteoconductive zone. *Dotted lines* represent the area of osteoconductive zone in nanofiber–ceramic (**A**) as well as nanofiber–microfiber constructs (**B**). Vessels are visible within the osteoconductive zones in nanofiber–ceramic constructs (*arrows*).
