# Supplementary material
Source: PubMed Central journal article supplement (PMC4605360)
Supplement: Supp_Fig5.pdf [file Supp_Fig5.pdf]

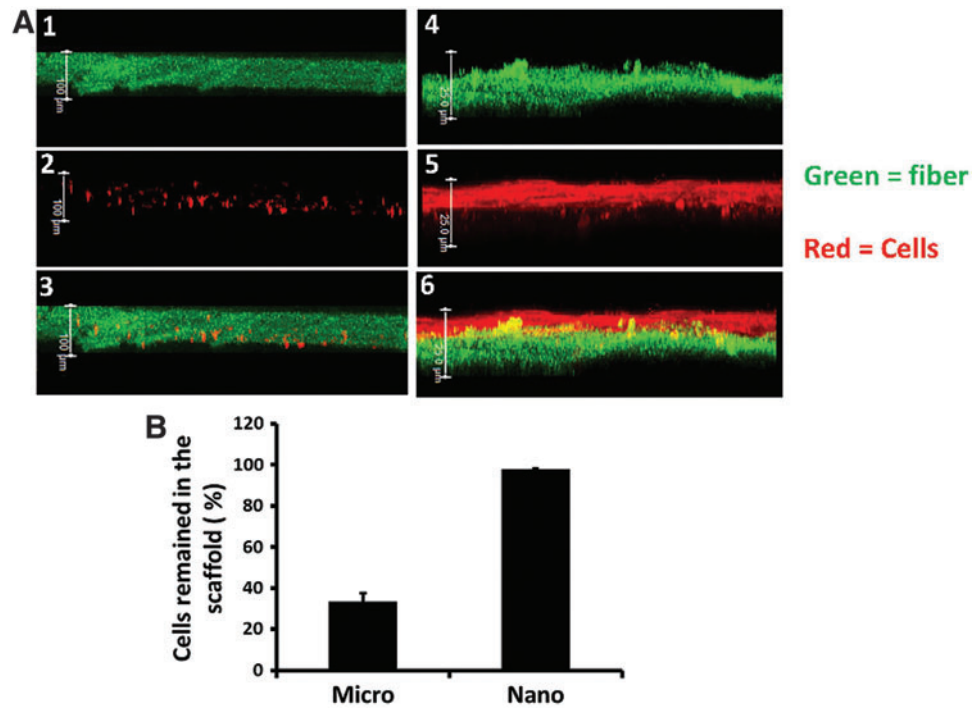

**SUPPLEMENTARY FIG. S5.** Cell infiltration on nanofibrous and microfibrinous scaffolds. **(A1–A3)** The confocal z-stacked images (A1, microfibers; A2, human MSCs [hMSCs]; A3, merged) of hMSC-seeded microfibers stained for actin after 24 h. **(A4–A6)** The confocal z-stacked images (A4, nanofibers; A5, hMSCs; A6, merged) of hMSC-seeded nanofibers stained for actin after 24 h. **(B)** The percentage of cells remained in the scaffolds (triplicated samples).
