# Supplementary material
Source: PubMed Central journal article supplement (PMC4605360)
Supplement: Supp_Fig6.pdf [file Supp_Fig6.pdf]

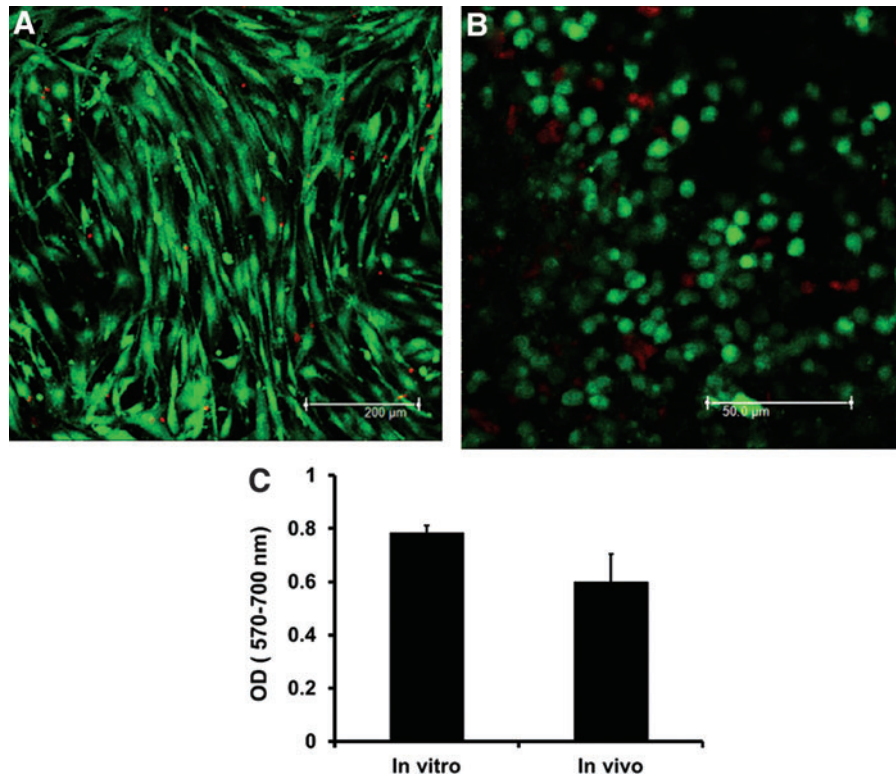

**SUPPLEMENTARY FIG. S6.** Viability of mesenchymal stem cells (MSCs) on angiogenic zones. (A) The confocal image after the live–dead staining of MSCs on the osteogenic zone at 48 h of *in vitro* incubation and (B) at 48 h after *in vivo* implantation. (C) The quantification of viability using Alamar blue assay (triplicated samples).
